# Supplementary material
Source: MDPI journal article supplement (https://www.mdpi.com/2077-0472/14/1/9)
Supplement: s1 [file s1]

Table S1 Correlation analysis of strawberry growth indices with soil environmental factors and soil-borne pathogens

|                     | AN        | NN       | AP       | AK       | OM      | pH     | EC       | S-CAT     | S-SC     | S-UE   | <i>Fusarium</i> | <i>Phytophthora</i> | Height   | Diameter | Chlorophyll<br>II |
|---------------------|-----------|----------|----------|----------|---------|--------|----------|-----------|----------|--------|-----------------|---------------------|----------|----------|-------------------|
| AN                  |           |          |          |          |         |        |          |           |          |        |                 |                     |          |          |                   |
| NN                  | -0.076    |          |          |          |         |        |          |           |          |        |                 |                     |          |          |                   |
| AP                  | 0.717***  | 0.213    |          |          |         |        |          |           |          |        |                 |                     |          |          |                   |
| AK                  | 0.296     | 0.670**  | 0.780*** |          |         |        |          |           |          |        |                 |                     |          |          |                   |
| OM                  | 0.786***  | -0.098   | 0.859*** | 0.504*   |         |        |          |           |          |        |                 |                     |          |          |                   |
| pH                  | -0.017    | -0.397   | -0.183   | -0.390   | -0.109  |        |          |           |          |        |                 |                     |          |          |                   |
| EC                  | 0.288     | 0.739*** | 0.603**  | 0.827*** | 0.394   | -0.288 |          |           |          |        |                 |                     |          |          |                   |
| S-CAT               | 0.628**   | -0.617** | 0.230    | -0.350   | 0.398   | 0.489* | -0.396   |           |          |        |                 |                     |          |          |                   |
| S-SC                | 0.231     | -0.567*  | 0.168    | -0.208   | 0.170   | 0.442  | -0.509*  | 0.736***  |          |        |                 |                     |          |          |                   |
| S-UE                | 0.297     | 0.870*** | 0.540*   | 0.814*** | 0.235   | -0.258 | 0.779*** | -0.277    | -0.239   |        |                 |                     |          |          |                   |
| <i>Fusarium</i>     | -0.714*** | 0.709*** | -0.332   | 0.296    | -0.566* | -0.321 | 0.293    | -0.890*** | -0.529*  | 0.401  |                 |                     |          |          |                   |
| <i>Phytophthora</i> | -0.661**  | 0.761*** | -0.324   | 0.308    | -0.561* | -0.357 | 0.358    | -0.902*** | -0.626** | 0.440  | 0.988***        |                     |          |          |                   |
| Height              | 0.840***  | -0.209   | 0.702**  | 0.270    | 0.661** | 0.079  | 0.140    | 0.708**   | 0.491*   | 0.195  | -0.745***       | -0.723***           |          |          |                   |
| Diameter            | 0.252     | -0.699** | 0.149    | -0.287   | 0.247   | 0.451  | -0.576*  | 0.771***  | 0.972*** | -0.376 | -0.619**        | -0.719***           | 0.464    |          |                   |
| Chlorophyll         | 0.593**   | -0.513*  | 0.605**  | 0.139    | 0.666** | 0.263  | -0.172   | 0.740***  | 0.831*** | -0.078 | -0.706**        | -0.777***           | 0.734*** | 0.863*** |                   |
| Weight              | 0.702**   | -0.572*  | 0.498*   | -0.069   | 0.577*  | 0.338  | -0.239   | 0.910***  | 0.802*** | -0.162 | -0.884***       | -0.914***           | 0.853*** | 0.821*** | 0.911***          |

\*  $0.01 < P \leq 0.05$ ; \*\*  $0.001 < P \leq 0.01$ ; \*\*\*  $P \leq 0.001$ .
